# Supplementary material for: Antioxidants stimulate BACH1-dependent tumor angiogenesis
Source: PubMed Central journal article supplement (PMC10575724; doi:10.1172/jci169671), 2023-10-16
Supplement: jci-133-169671-s104.pdf [file jci-133-169671-s104.pdf]

## Supplemental material

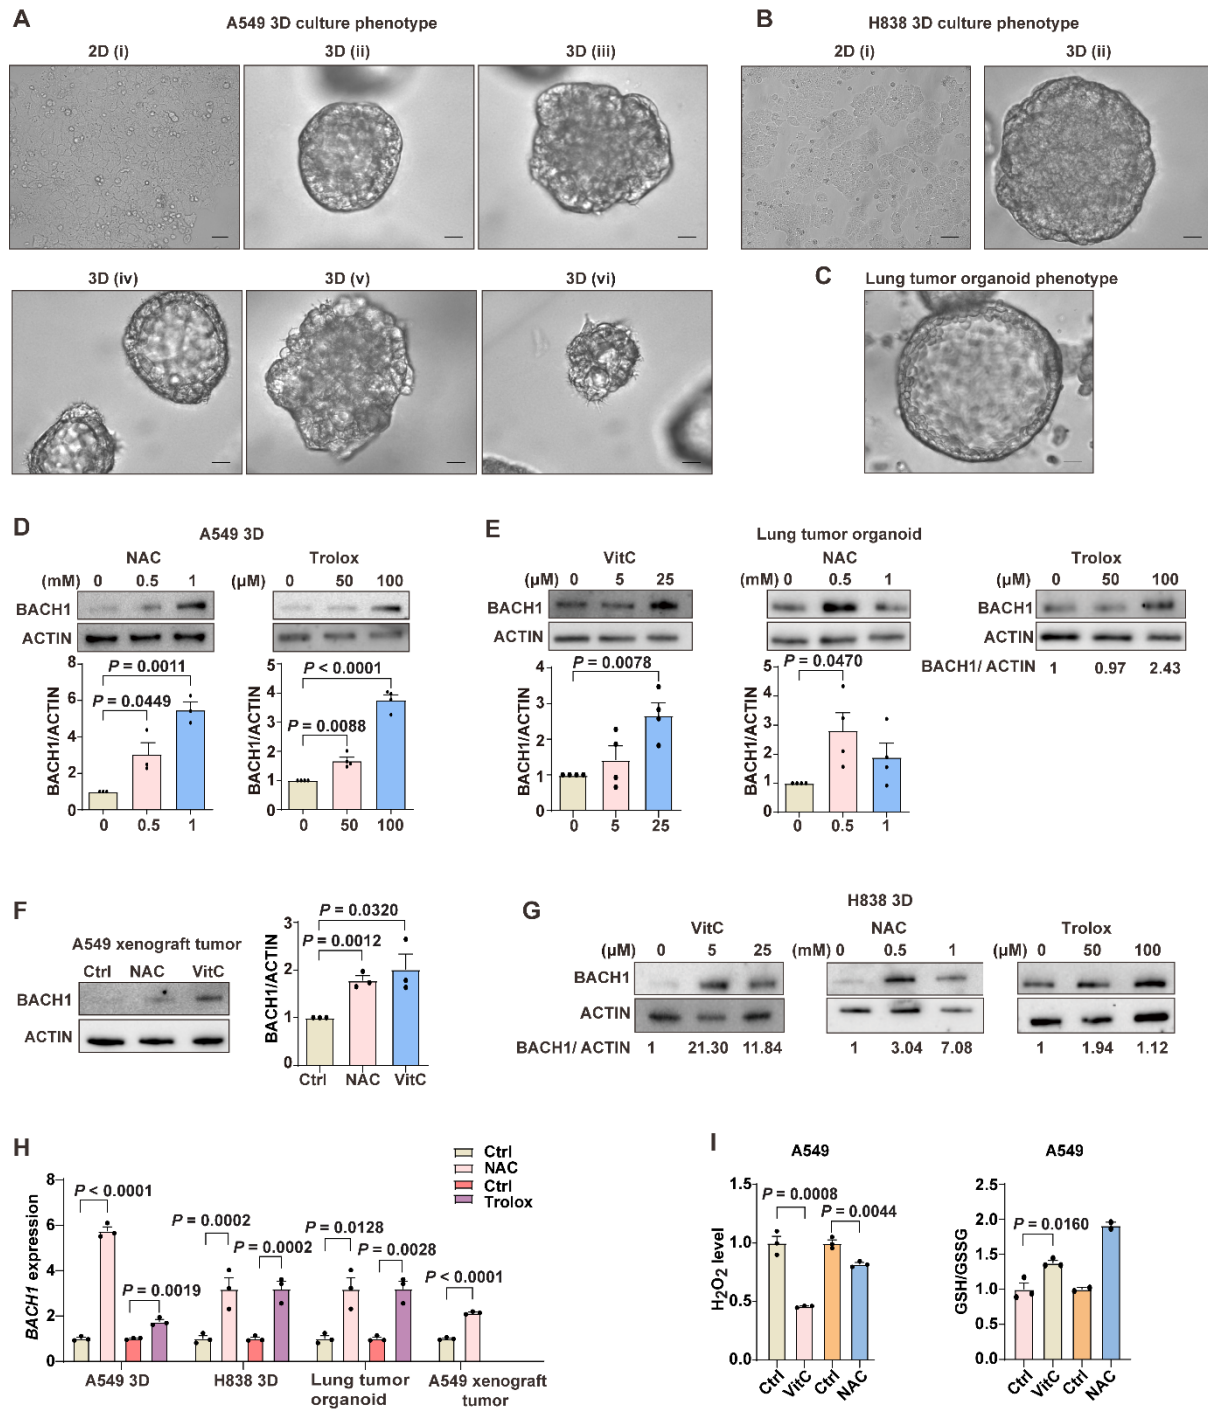

**Supplemental Figure 1. NAC, VitC, and Trolox increase BACH1 gene and protein levels in human lung cancer cell spheroids and mouse tumor-derived organoids.**

(A) Bright-field images showing morphology of A549 cells cultured in 2D (i) and 3D spheroids (ii-vi). Scale bar, 100 μm. (B) Bright-field images showing morphology of H838 cells cultured in 2D (i) and 3D spheroids (ii). (C) Image showing the typical morphology of a mouse lung tumor organoid. (D) BACH1 protein levels in A549 spheroids incubated with NAC (left) and Trolox (right) for 7 days (n = 3-4 experiments). (E) BACH1 protein levels in mouse lung tumor organoids incubated 7 days with VitC,

NAC, and Trolox (n = 4 experiments) for NAC and VitC; BACH1/ACTIN ratio of the experiment with Trolox is indicated. **(F)** BACH1 protein levels in A549 xenograft tumors isolated from mice following administration of 1 g/l NAC and 3.47 g/l VitC in the drinking water for 7 weeks (n = 3 mice/3 experiments). **(G)** BACH1 protein levels in H838 spheroids incubated with 25  $\mu$ M VitC, 1 mM NAC, and 100  $\mu$ M Trolox for 7 days. The BACH1/ACTIN ratio is indicated. **(H)** RT-qPCR of *BACH1* in A549 and H838 spheroids, and mouse lung tumor organoids incubated 7 days with 1 mM NAC and 100  $\mu$ M Trolox, and A549 xenograft tumors from mice administrated NAC (1 g/l) in the drinking water for 7 weeks (n = 3 experiments). **(I)** H<sub>2</sub>O<sub>2</sub> and GSH/GSSG levels in A549 cells incubated 7 days with 1 mM NAC and 25  $\mu$ M VitC (n = 2-3 experiments). Scale bars, 100  $\mu$ m. Data are mean and SEM. Statistics: Two-tailed unpaired Student's *t* test (panel H, I) and one-way ANOVA with Tukey's post-hoc test for multiple comparisons (panel D, E, F).

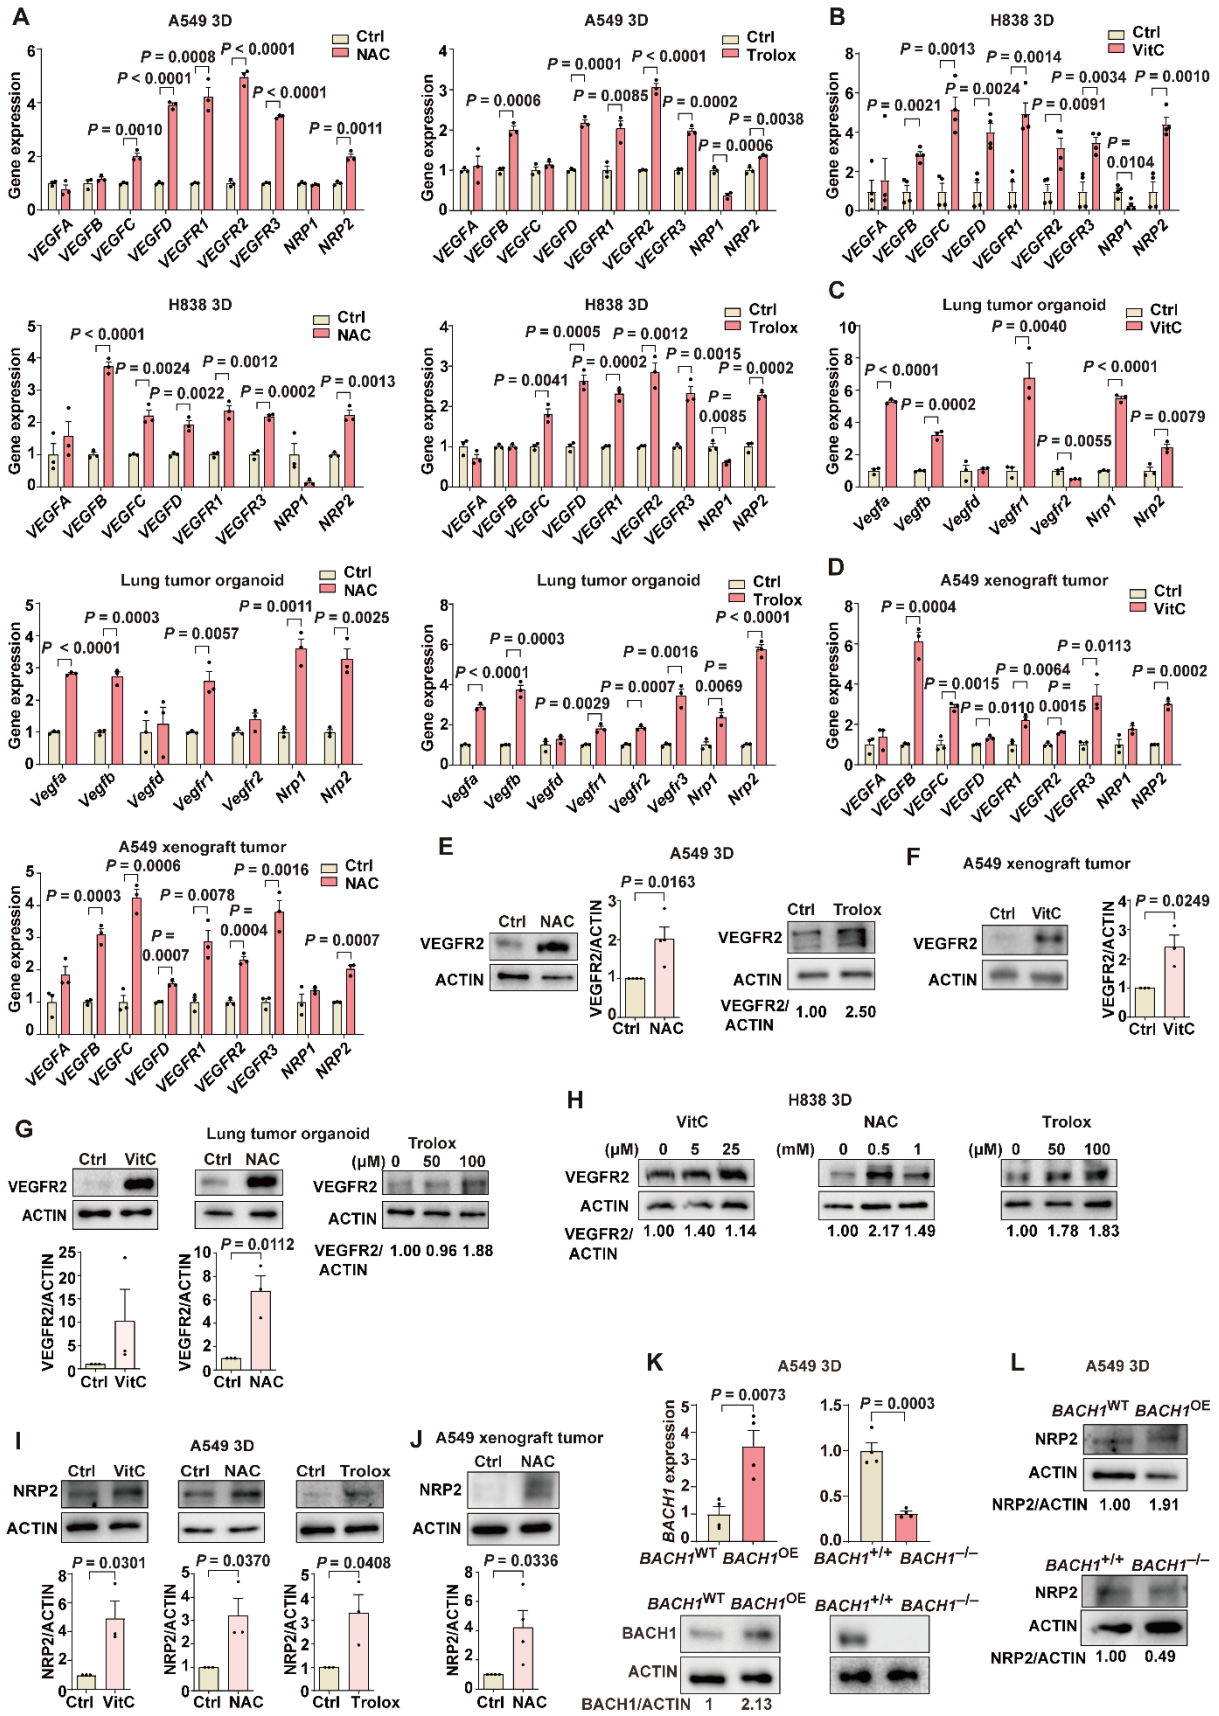

**Supplemental Figure 2. BACH1 controls expression of angiogenesis genes in lung tumor organoids and spheroids under normoxic conditions. (A) RT-qPCR**

of angiogenesis genes in A549 spheroids incubated 7 days with 1 mM NAC (left) and 100  $\mu$ M Trolox (right) (n = 3 experiments). **(B and C)** RT-qPCR of angiogenesis genes in H838 spheroids (B) and lung tumor organoids (C) incubated with 25  $\mu$ M VitC, 1 mM NAC, and 100  $\mu$ M Trolox (n = 2 experiments). **(D)** RT-qPCR of angiogenesis genes in A549 xenograft tumors isolated from mice administered 3.47 g/l VitC or 1 g/l NAC in the drinking water for 7 weeks (n = 3 experiments). **(E)** Left, VEGFR2 protein levels in spheroids incubated with 1 mM NAC (n = 4 experiments). Right, VEGFR2 protein levels in spheroids incubated with 100  $\mu$ M Trolox. **(F)** Left, VEGFR2 protein levels in xenograft tumors isolated from mice administered 3.47 g/l VitC in the drinking water for 7 weeks. Right, VEGFR2 levels by densitometry (n = 3 mice/3 experiments). **(G)** Top, VEGFR2 protein levels in mouse lung tumor organoids incubated with 25  $\mu$ M VitC, 1 mM NAC, and 50 and 100  $\mu$ M Trolox. Bottom, BACH1 levels by densitometry in three VitC and NAC experiments; for Trolox VEGFR2/ACTIN ratio is indicated. **(H)** VEGFR2 protein levels in H838 spheroids incubated with antioxidants for 7 days. **(I)** NRP2 protein levels in spheroids incubated with 25  $\mu$ M VitC, 1 mM NAC, and 100  $\mu$ M Trolox (n = 3 experiments). **(J)** NRP2 protein levels in xenograft tumors isolated from mice administered 1 g/l NAC in the drinking water for 7 weeks (n = 4 mice; 3 experiments). **(K)** Left top, RT-qPCR of *BACH1* in *BACH1*<sup>OE</sup> and control cells with normal *BACH1* expression (*BACH1*<sup>WT</sup>). Bottom, *BACH1* protein levels. Right top, RT-qPCR of *BACH1* in *BACH1*<sup>+/+</sup> and *BACH1*<sup>-/-</sup> spheroids. Bottom, *BACH1* protein levels. **(L)** NRP2 protein levels in *BACH1*<sup>WT</sup> and *BACH1*<sup>OE</sup> (left) and *BACH1*<sup>+/+</sup> and *BACH1*<sup>-/-</sup> (right) spheroids. Data are mean and SEM. Statistics: Two-tailed unpaired Student's *t* test (panel A, B, C, D, E, F, G, I, J, K).

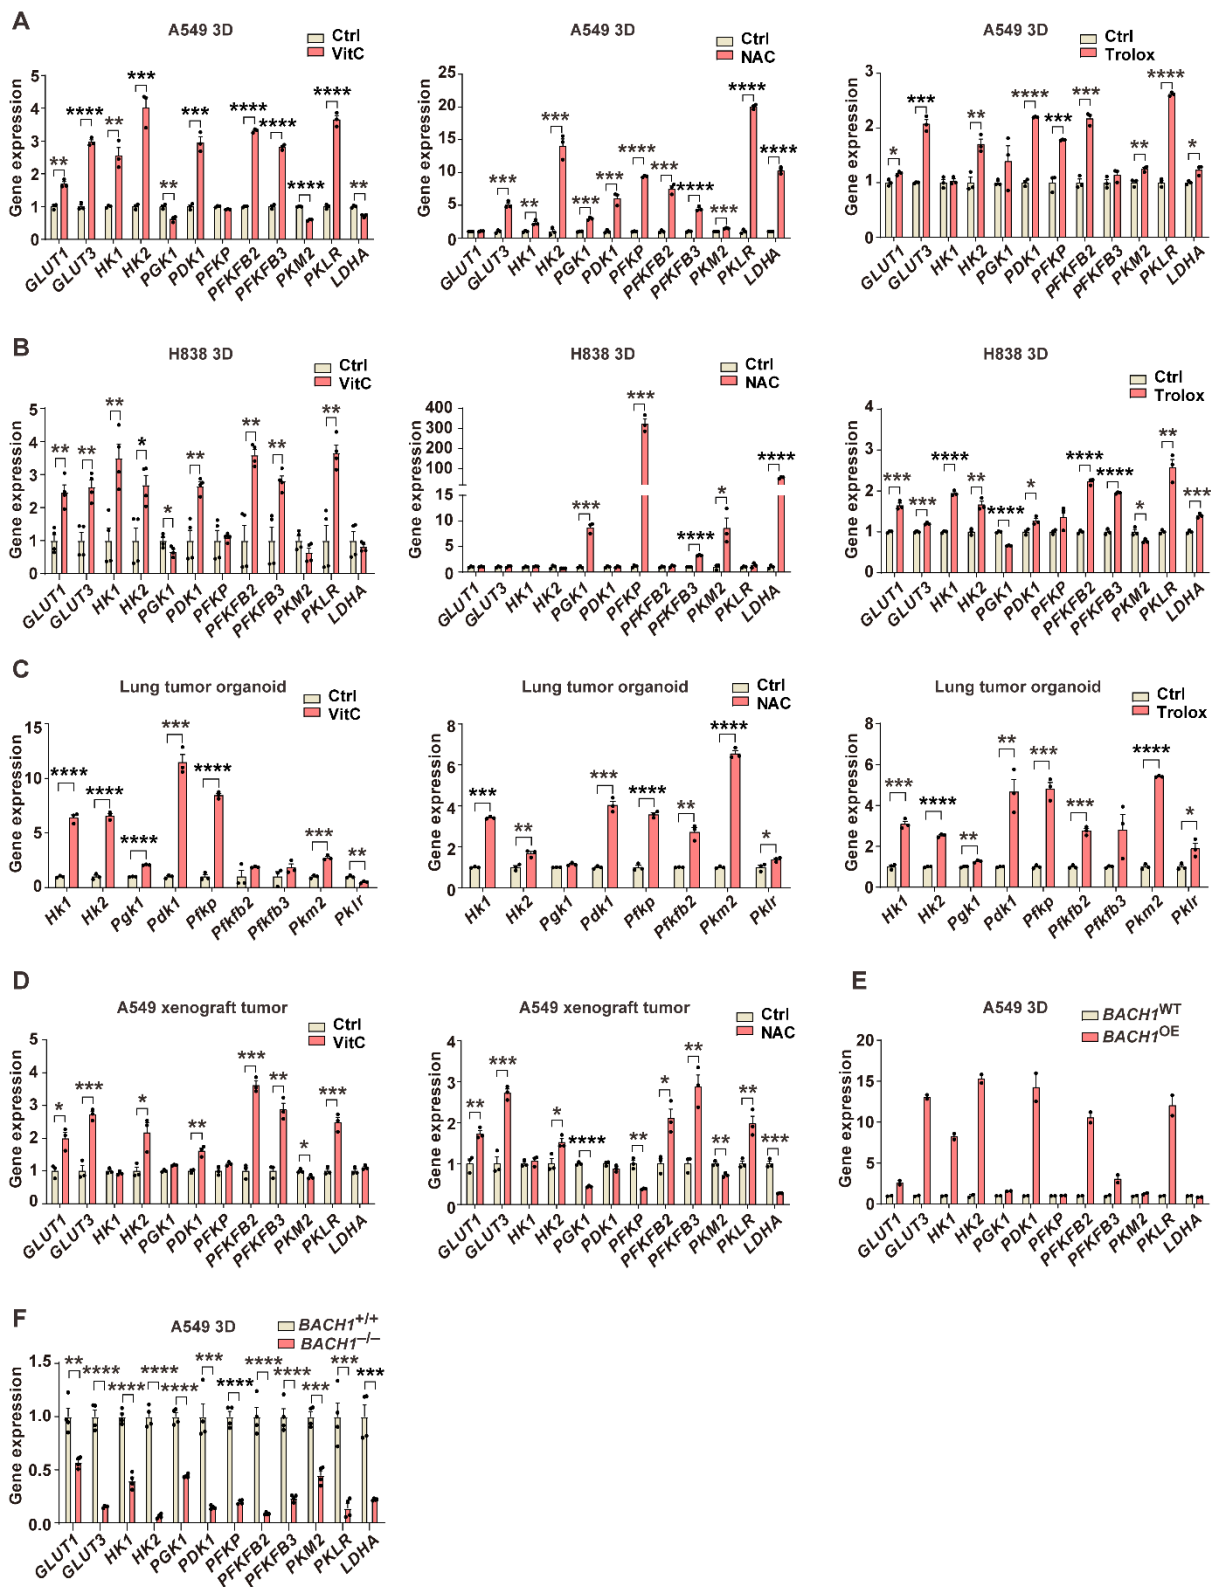

**Supplemental Figure 3. BACH1 controls expression of a broad range of glycolysis genes in spheroids, organoids, and xenografts. (A–C)** RT-qPCR analyses of glycolysis-related genes in A549 spheroids (A), H838 spheroids (B), and mouse lung tumor organoids. (C) incubated 7 days with 25  $\mu$ M VitC (left), 1 mM NAC (middle), and 100  $\mu$ M Trolox (right) ( $n = 2-3$  experiments). **(D)** RT-qPCR of glycolysis-related genes in A549 xenograft tumors isolated from mice administered 3.47 g/l VitC or 1 g/l NAC in the drinking water for 7 weeks ( $n = 3$  experiments). **(E and F)** RT-qPCR

of glycolysis-related genes in spheroids generated from *BACH1*<sup>WT</sup> and *BACH1*<sup>OE</sup> A549 cells (E) (n = 2 experiments); and from *BACH1*<sup>+/+</sup> and *BACH1*<sup>-/-</sup> A549 cells (F) (n = 4 experiments). Data are mean and SEM. Statistics: Two-tailed unpaired Student's *t* test (panel A, B, C, D, F). \* P < 0.05; \*\* P < 0.01; \*\*\* P < 0.005; \*\*\*\* P < 0.001.

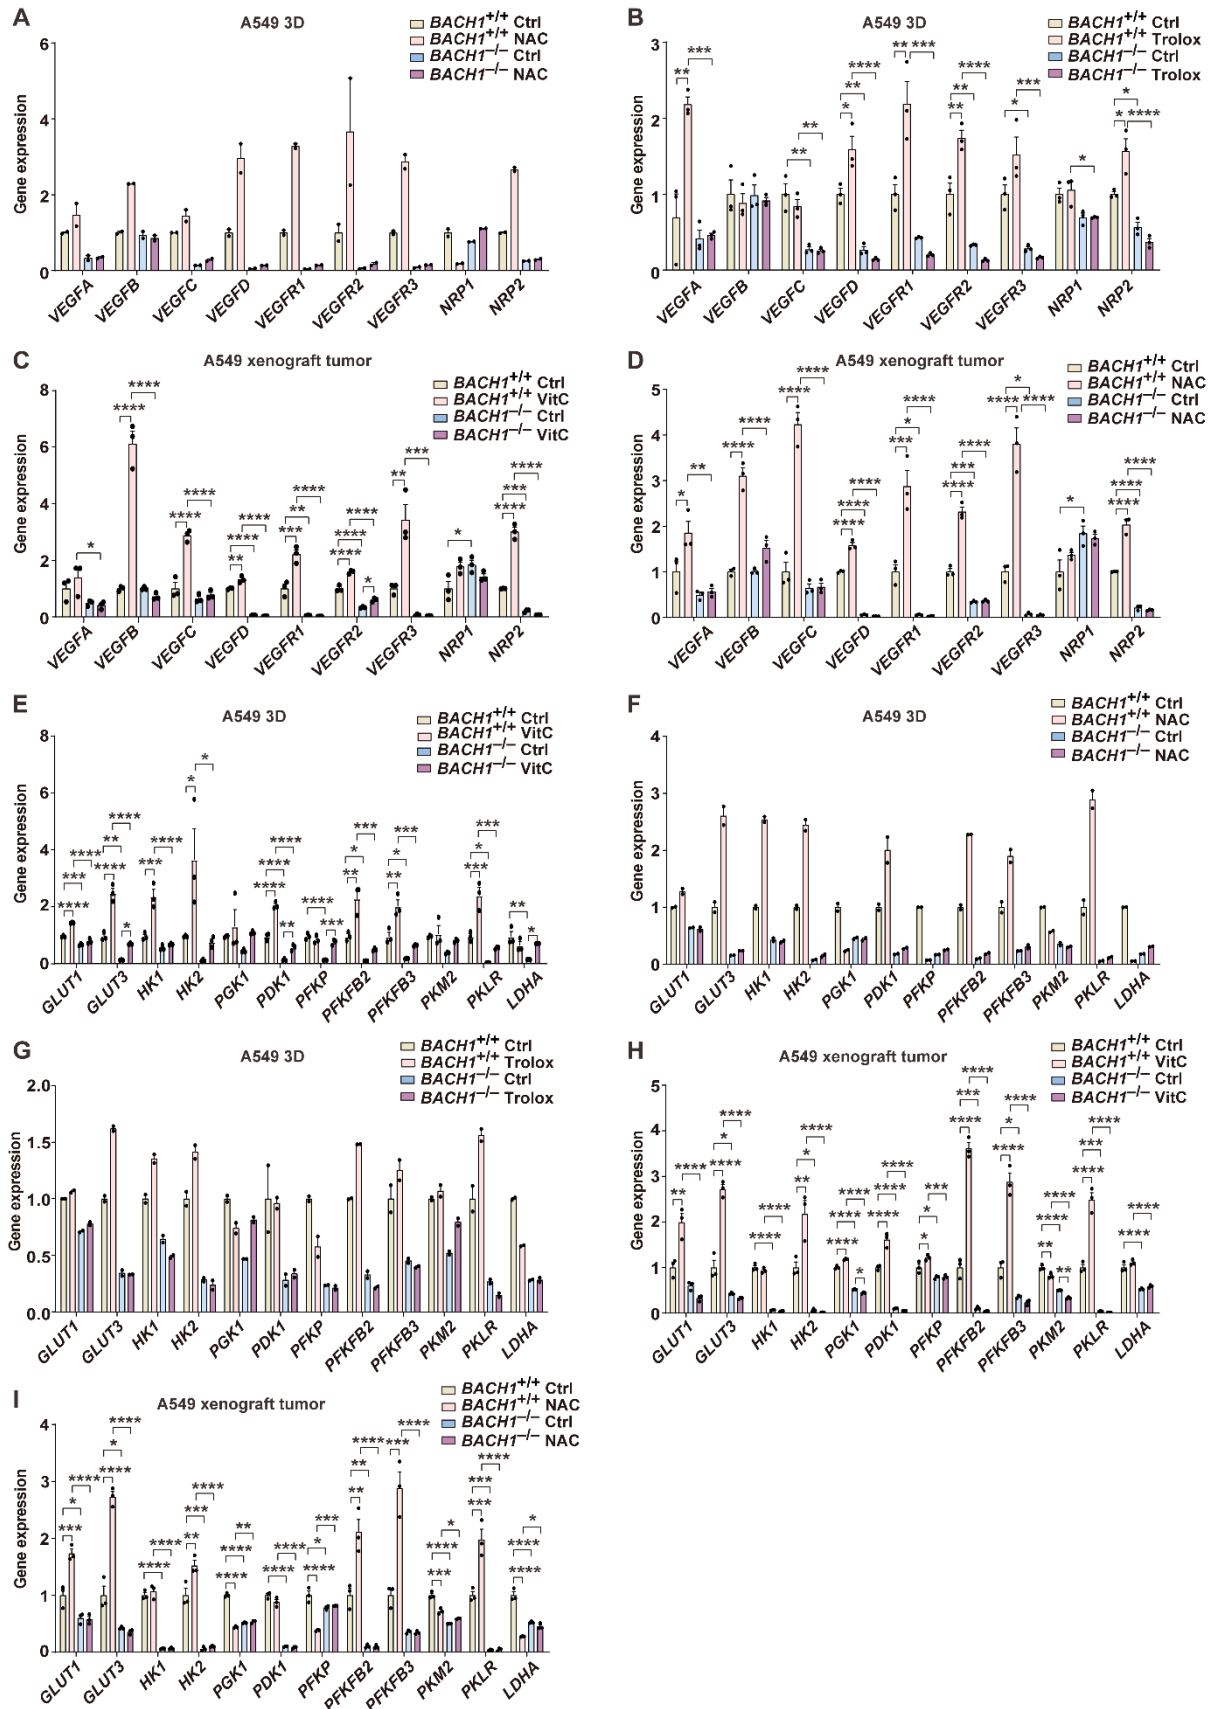

**Supplemental Figure 4. BACH1 controls basal and antioxidant-induced expression of angiogenesis and glycolysis genes in lung cancer cell spheroids**

**and xenograft tumors. (A–D)** RT-qPCR analyses of angiogenesis-related genes in *BACH1*<sup>+/+</sup> and *BACH1*<sup>-/-</sup> A549 spheroids incubated with 1 mM NAC (A) and 100  $\mu$ M Trolox (B); and *BACH1*<sup>+/+</sup> and *BACH1*<sup>-/-</sup> A549 xenograft tumors isolated from mice following administration of 3.47 g/l VitC (C) and 1 g/l NAC (D) for 7 weeks (n = 2-3 experiments). **(E–I)** RT-qPCR analyses of glycolysis-related genes in *BACH1*<sup>+/+</sup> and *BACH1*<sup>-/-</sup> A549 spheroids incubated with 25  $\mu$ M VitC (E), 1 mM NAC (F), and 100  $\mu$ M Trolox (G) for 7 days; and *BACH1*<sup>+/+</sup> and *BACH1*<sup>-/-</sup> A549 xenograft tumors isolated from mice following administration of 3.47 g/l VitC (H) and 1 g/l NAC (I) for 7 weeks (n = 2-3 experiments). Data are mean and SEM. Statistics: One-way ANOVA with Tukey's post-hoc test for multiple comparisons (panel B, C, D, E, H, I). \* P < 0.05; \*\* P < 0.01; \*\*\* P < 0.005; \*\*\*\* P < 0.001.



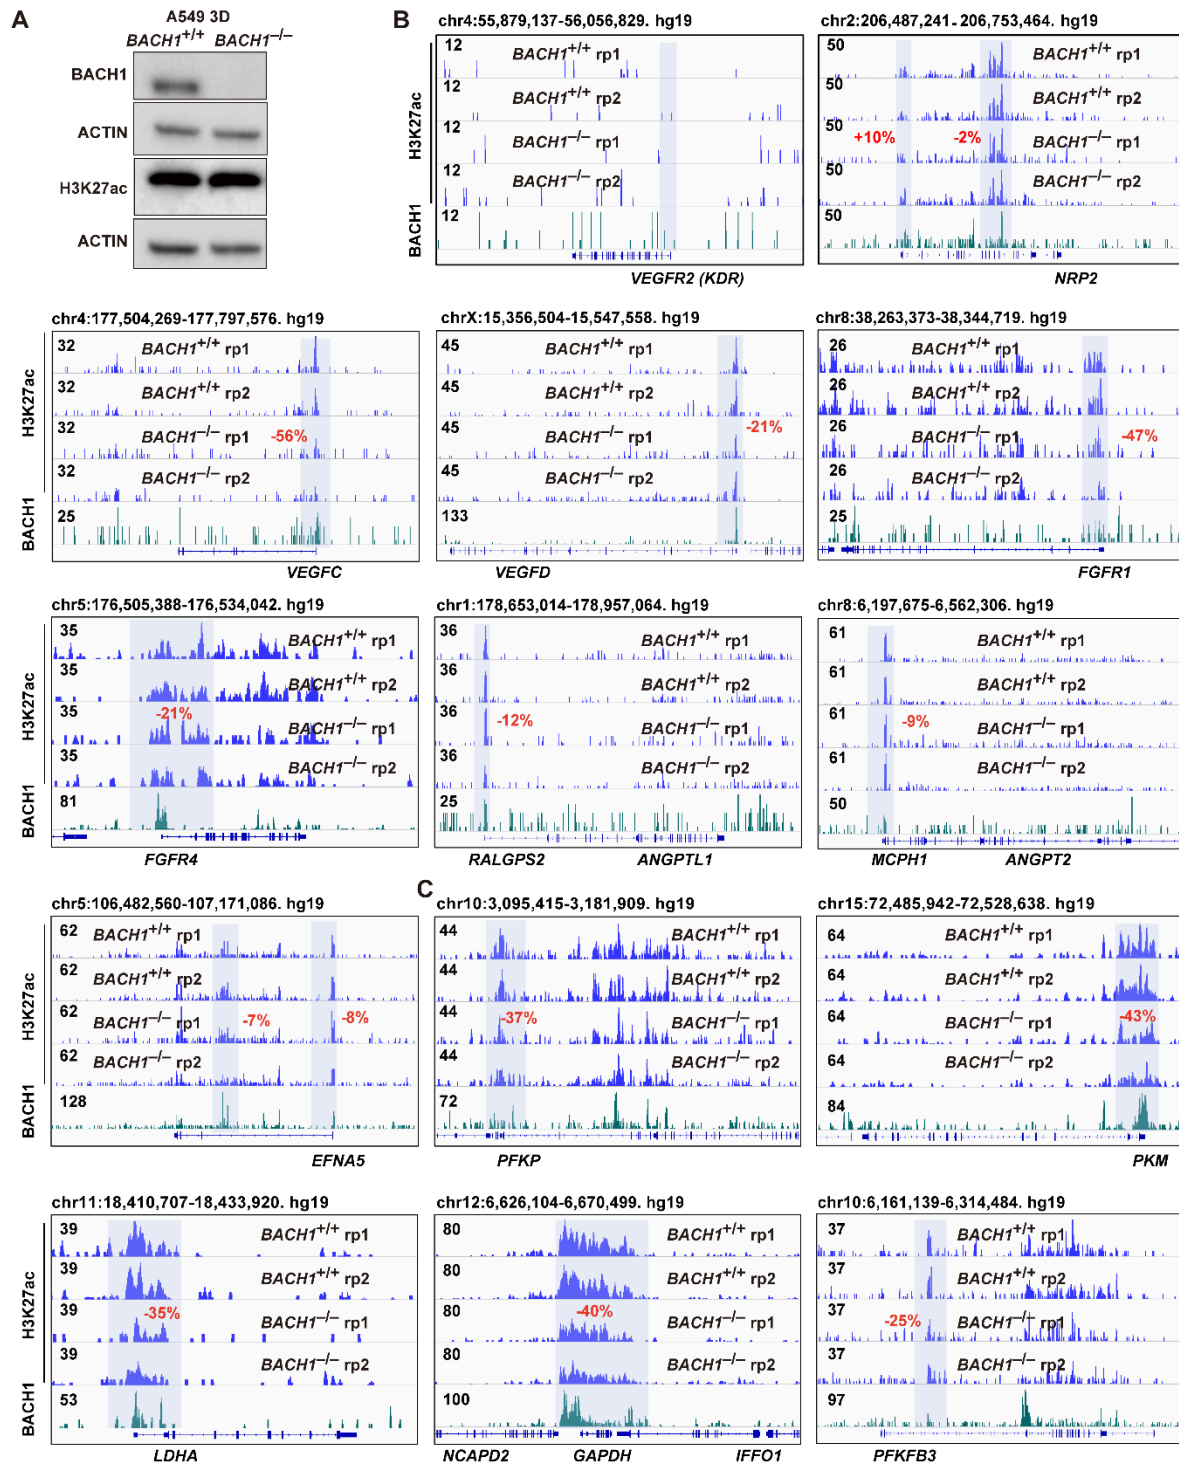

**Supplemental Figure 5. BACH1-mediated expression of angiogenesis and glycolysis genes correlates with BACH1-dependent epigenetic changes at promoter regions. (A)** Western blot analysis showing basal protein amounts of BACH1 and H3K27ac in *BACH1*<sup>+/+</sup> and *BACH1*<sup>-/-</sup> A549 spheroids. **(B and C)** Integrative Genomics Viewer (IGV) tracks showing H3K27ac levels at the indicated angiogenesis (B, 9 panels) and glycolysis (C, 5 panels) gene loci in *BACH1*<sup>+/+</sup> and *BACH1*<sup>-/-</sup> A549 spheroids. BACH1 peaks are shown at the bottom to indicate overlap with H3K27ac-marked regions. Regions with significant H3K27ac changes in *BACH1*<sup>-/-</sup>

$^{-}$  compared with *BACH1*<sup>+/+</sup> A549 spheroids are highlighted in blue; the percent change is indicated with red numbers.

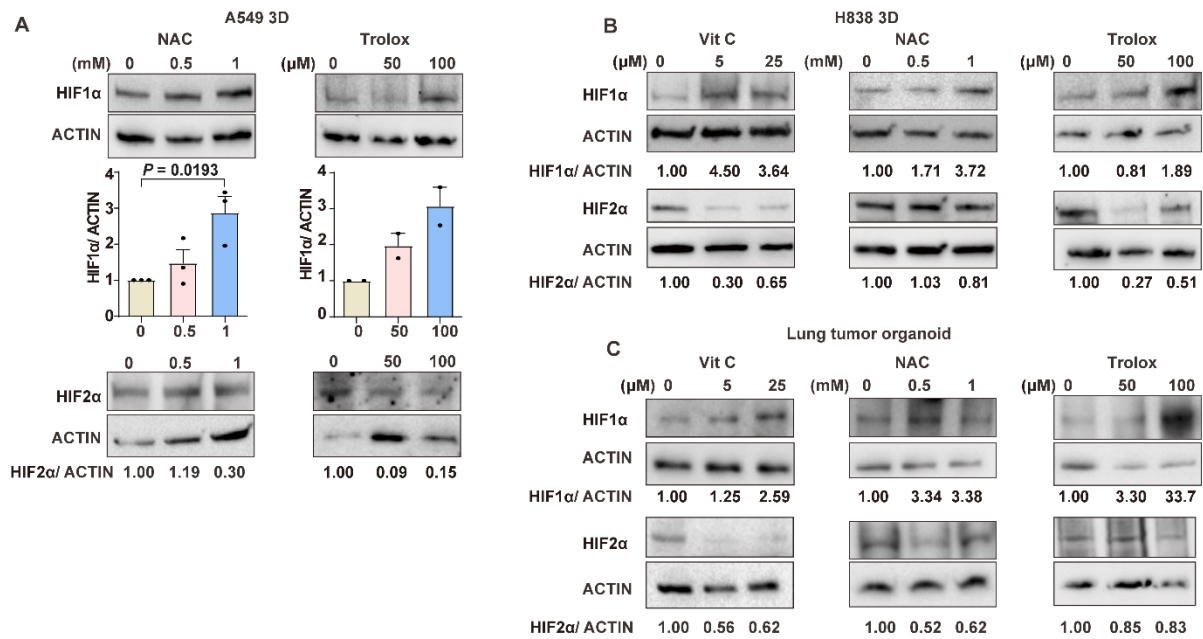

**Supplemental Figure 6. The antioxidants VitC, NAC, and Trolox increase HIF1 $\alpha$  but not HIF2 $\alpha$  expression under normoxia in A549 and H838 spheroids and in organoids from mouse KRAS-induced lung tumors. (A)** Western blots showing levels of HIF1 $\alpha$  (top) and HIF2 $\alpha$  (bottom) expression in A549 spheroid incubated with NAC (left) and Trolox (right) for 7 days. Middle, amounts of HIF1 $\alpha$  determined by densitometry of protein bands ( $n = 2-3$  experiments); HIF2 $\alpha$ /ACTIN densitometry ratios are indicated. **(B and C)** Western blots showing levels of HIF1 $\alpha$  (top) and HIF2 $\alpha$  (bottom) in H838 spheroids (B) and mouse lung tumor organoids (C) incubated with VitC (left), NAC (middle), and Trolox (right) for 7 days. HIF1 $\alpha$ /ACTIN and HIF2 $\alpha$ /ACTIN densitometry ratios are indicated. ACTIN was the loading control. Data are mean and SEM. Statistics: One-way ANOVA with Tukey's post-hoc test for multiple comparisons (panel A).

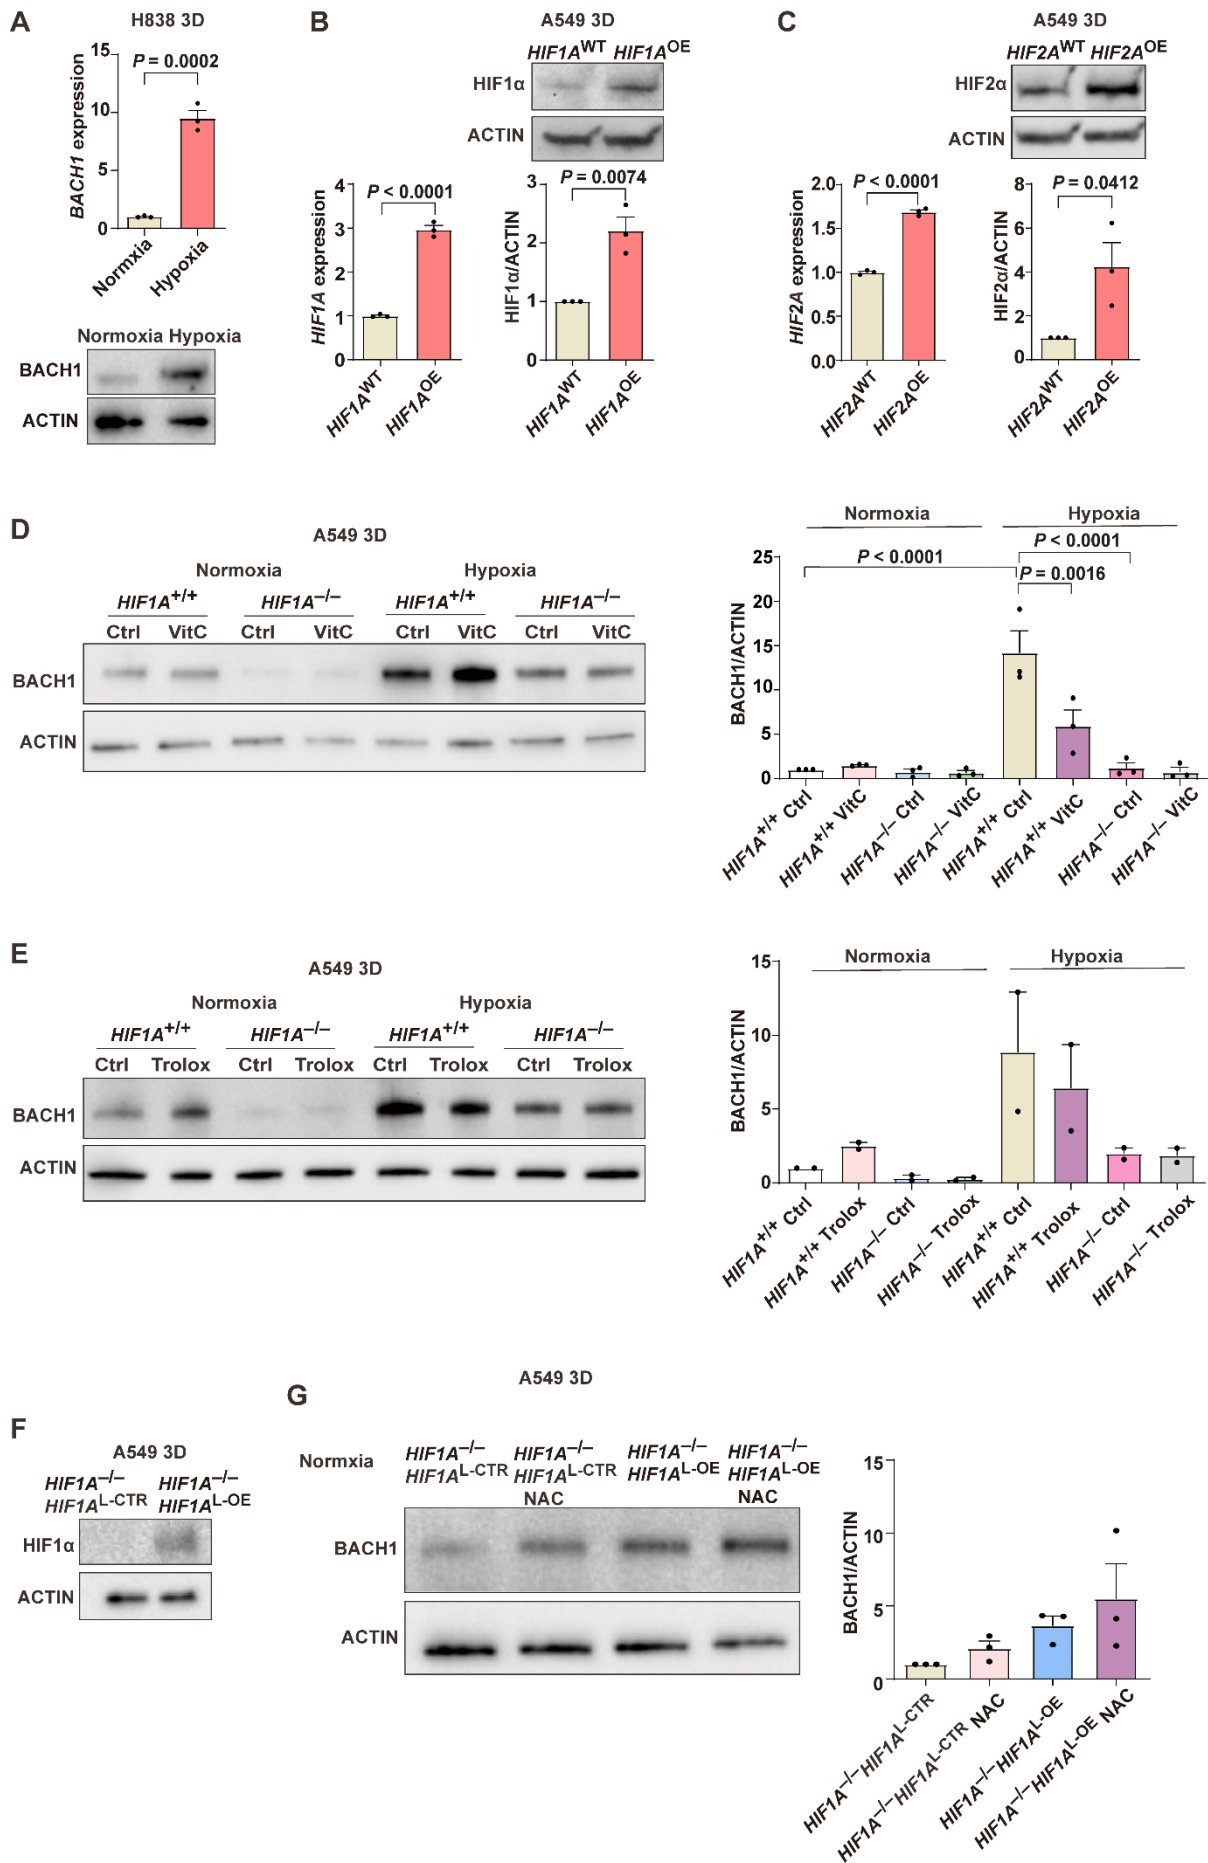

**Supplemental Figure 7. BACH1 expression under both normoxia and hypoxia is HIF1 $\alpha$  dependent.** (A) RT-qPCR (top) and western blot (bottom) showing BACH1 gene and protein expression in H838 spheroids incubated for 7 days under normoxia (21% O<sub>2</sub>) and hypoxia (1% O<sub>2</sub>) (n = 2 experiments). (B) Control experiment documenting increased HIF1 $\alpha$  expression by RT-qPCR (left) and western blot (right, top) in *HIF1A*<sup>WT</sup> and *HIF1A*<sup>OE</sup> A549 spheroids. Bottom right, amounts of HIF1 $\alpha$  determined by densitometry of protein bands (n = 3 experiments). (C) Analyses of *HIF2A*<sup>WT</sup> and *HIF2A*<sup>OE</sup> A549 spheroids in similar experiments as in panel B. (D and E) Left, western blot showing BACH1 expression in *HIF1A*<sup>-/-</sup> and control *HIF1A*<sup>+/+</sup> A549 spheroids incubated for 7 days with 25 mM VitC (D), 100  $\mu$ M Trolox (E), and control medium (D and E) under normoxia (21% O<sub>2</sub>) and hypoxia (1% O<sub>2</sub>). Right, amounts of BACH1 determined by densitometry of protein bands (n = 2-3 experiments). (F) Western blot documenting restored HIF1 $\alpha$  expression in *HIF1A*<sup>-/-</sup> A549 spheroids upon lentiviral transduction with a cDNA encoding human HIF1a (*HIF1A*<sup>L-OE</sup>); control cells were transduced with EGFP (*HIF1A*<sup>L-CTR</sup>). (G) Left, western blot showing BACH1 expression in *HIF1A*<sup>-/-</sup>*HIF1A*<sup>L-OE</sup> and control *HIF1A*<sup>-/-</sup>*HIF1A*<sup>L-CTR</sup> A549 spheroids incubated with 1 mM NAC or control medium for 7 days. Right, amounts of BACH1 determined by densitometry of protein bands (n = 3 experiments). ACTIN was the loading control in western blots. ns, not significant. Data are mean and SEM. Statistics: Two-tailed unpaired Student's *t* test (panel A, B, C) and one-way ANOVA with Tukey's post-hoc test for multiple comparisons (panel D).

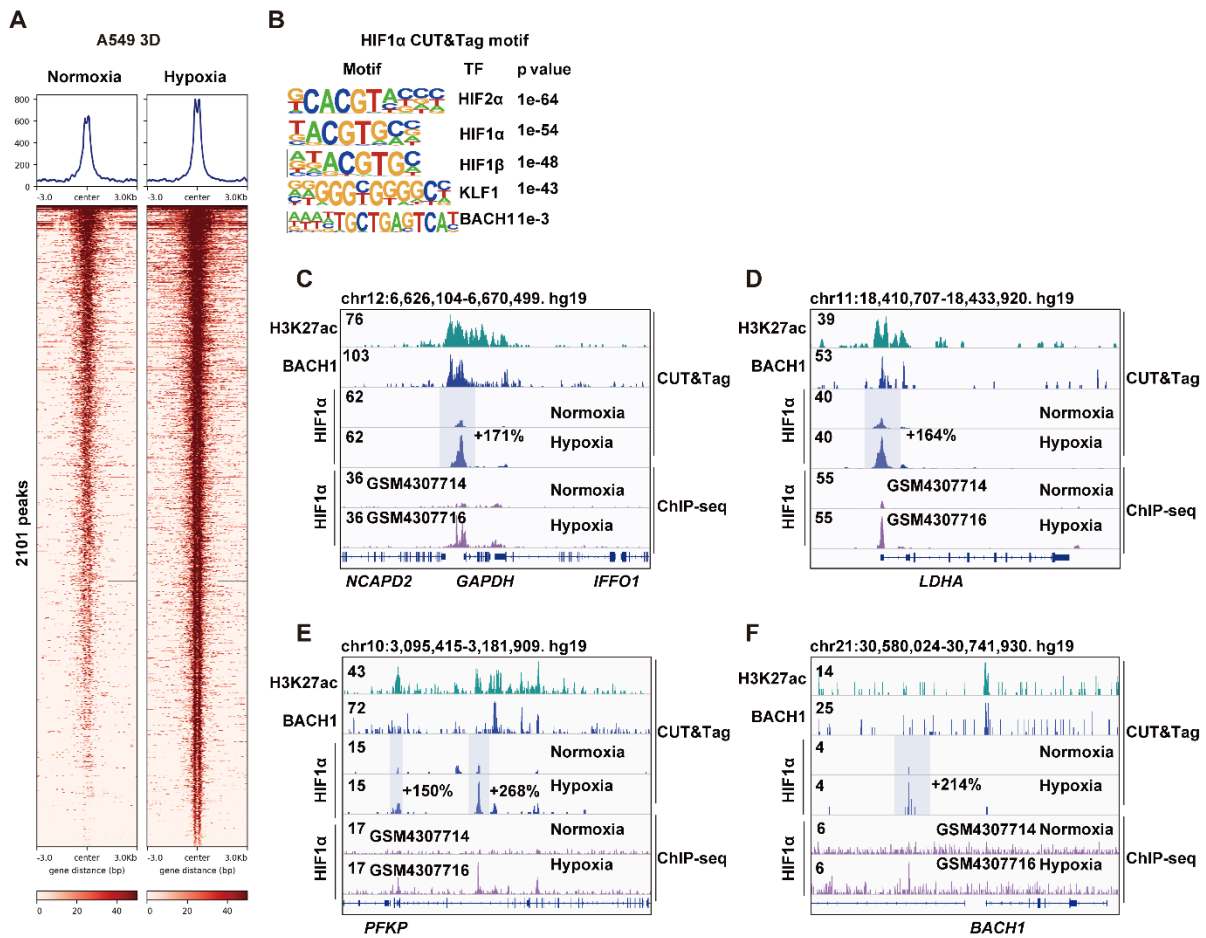

**Supplemental Figure 8. BACH1 expression under both normoxia and hypoxia is HIF1α dependent. Related to Figure 3. (A)** Genome-wide heatmap of HIF1α chromatin enrichment under normoxia (21% O<sub>2</sub>) and hypoxia (1% O<sub>2</sub>) for 7 days in A549 spheroids. **(B)** Transcription factor DNA-binding motif analysis of HIF1α CUT&Tag peaks. **(C–F)** IGV genome browser tracks showing HIF1α occupancy and levels at the indicated glycolysis-related gene loci (C–E) and at the BACH1 locus (F) in A549 spheroids cultured under normoxia (21% O<sub>2</sub>) and hypoxia (1% O<sub>2</sub>) for 7 days. H3K27ac and BACH1 tracks are shown at the top to indicate the genome environment. Previously published HIF1α ChIP-seq data are indicated at the bottom to compare with the CUT&Tag data. Regions with significant changes in HIF1α occupancy in response to hypoxia are highlighted in blue; the percent change is indicated with black numbers.

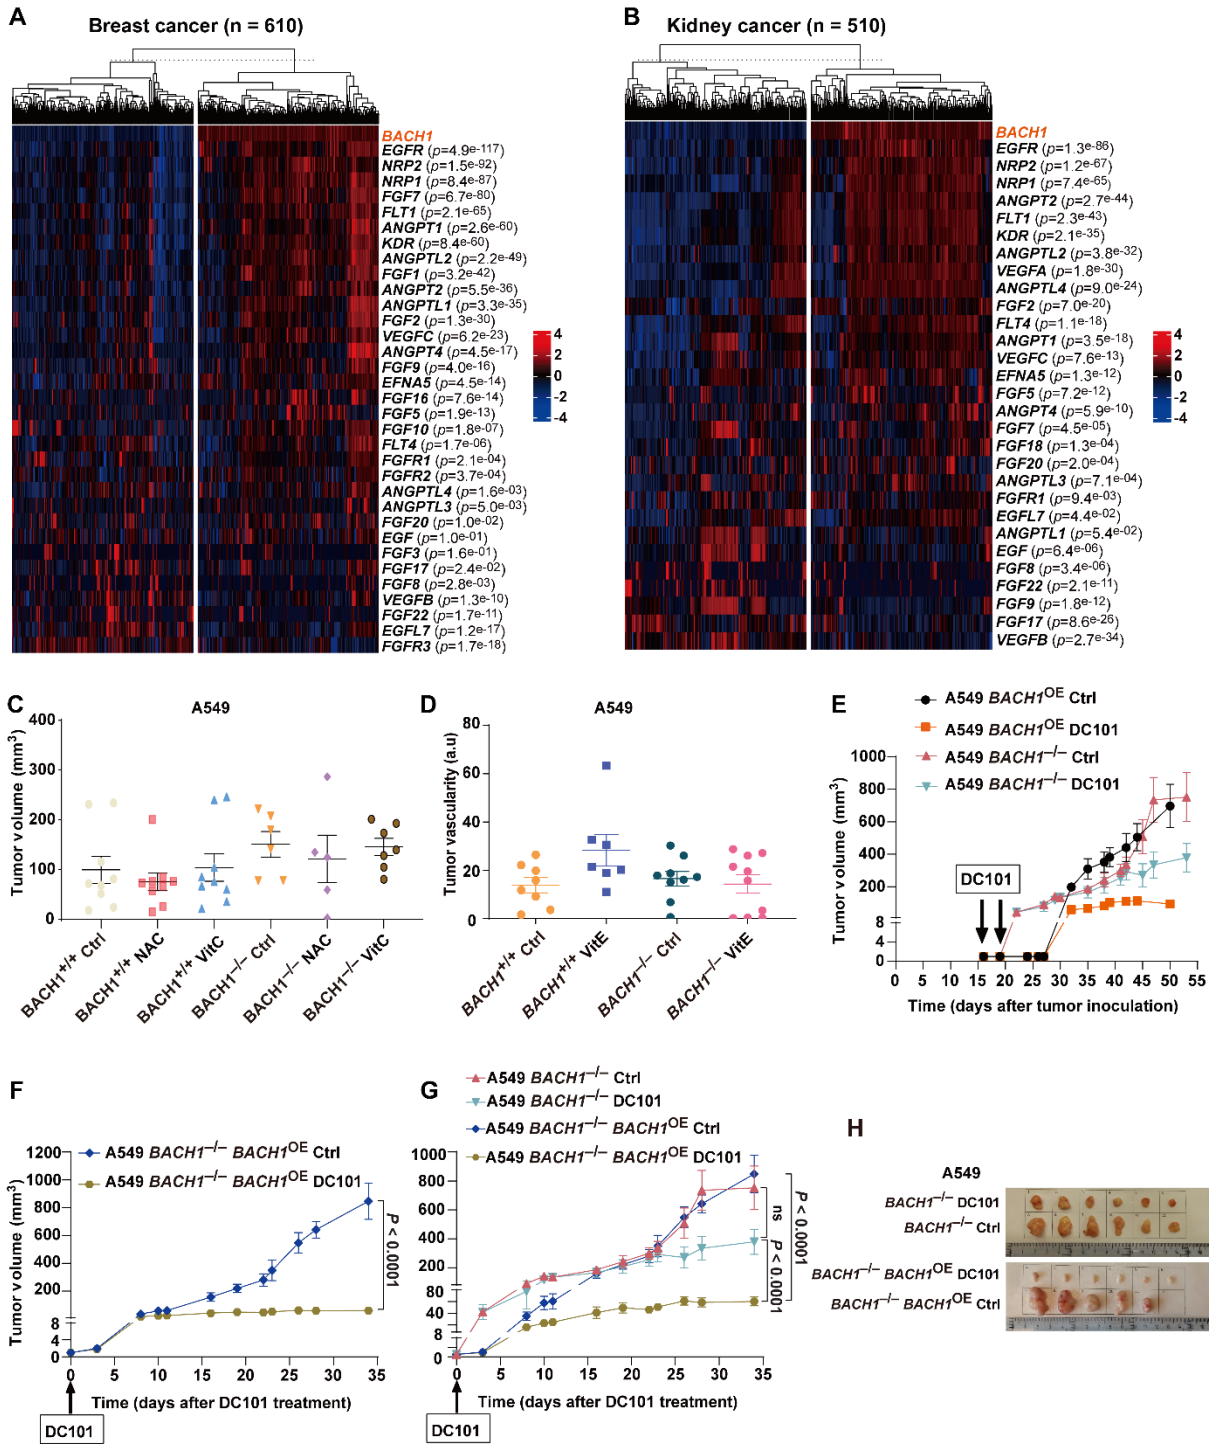

**Supplemental Figure 9. BACH1 expression correlates with angiogenesis gene expression in human breast and kidney cancer samples and increases the response to anti-VEGF therapy in xenografts. (A)** Heat maps showing TCGA breast cancer cases with low (left) and high (right) *BACH1* expression. Angiogenic genes whose expression differed significantly between the two groups are listed on the right along with p value for the correlation with *BACH1* expression. **(B)** TCGA kidney cancer cases analyzed as in panel A. **(C)** Tumor volume (percent of Ctrl) at endpoint from the experiment shown in Figure 7A and 7B. **(D)** Tumor vascularity (peak enhancement) in NSG mice injected s.c. with  $5 \times 10^5$  *BACH1*<sup>+/+</sup> or *BACH1*<sup>-/-</sup> A549 cells and administrated with 0.5 g/kg VitE in the chow (n = 7 and 10 for +/+ and -/-, respectively)

or received control food (n = 8 and 9, respectively) for 7 weeks. **(E)** Same experiment as in Figure 7D and 7E, but with the time from tumor cell injection to the end of the experiment shown on the x-axis (Figure 7D and 7E shows time from start of DC101 injections): note that *BACH1*<sup>-/-</sup> cells produced palpable tumors prompting injection with anti-VEGFR2 antibodies (DC101) three days after the *BACH1*<sup>OE</sup> cells; moreover, the mice carrying *BACH1*<sup>-/-</sup> tumors reached the humane endpoint for euthanasia three days after mice with *BACH1*<sup>OE</sup> tumors. **(F–H)** Tumor growth in NSG mice injected s.c. with  $5 \times 10^5$  *BACH1*<sup>-/-</sup> *BACH1*<sup>OE</sup> (F and H) A549 cells. When tumors were palpable, the mice were injected i.p. with PBS (n = 5) and 40 mg/kg DC101 (n = 6) three times a week for five weeks. Tumors were measured three to five times per week. **(G)** Curves from panels Supplementary 9F and Figure 4H shown in the same graph. Data are mean and SEM. Statistics: Two-way ANOVA with Sidak's post-hoc test for multiple comparisons (panel G). Panel H (upper image) was previously shown in Figure 7C (lower image).



**Supplemental Table 1. Direct BACH1 target genes in human lung tumor cells**

| <b>Gene</b>    | <b>Function</b> | <b>Effect</b> |
|----------------|-----------------|---------------|
| <i>GLUT1</i>   |                 |               |
| <i>GLUT3</i>   |                 |               |
| <i>PFKP</i>    |                 |               |
| <i>PFKFB2</i>  |                 |               |
| <i>PFKFB3</i>  | Glycolysis      | Activation    |
| <i>PKM</i>     |                 |               |
| <i>PGK1</i>    |                 |               |
| <i>PDK1</i>    |                 |               |
| <i>LDHA</i>    |                 |               |
| <i>GAPDH</i>   |                 |               |
| <i>HK2</i>     |                 |               |
| <i>VEGFA</i>   |                 |               |
| <i>VEGFC</i>   |                 |               |
| <i>VEGFD</i>   |                 |               |
| <i>VEGFR1</i>  |                 |               |
| <i>VEGFR2</i>  |                 |               |
| <i>VEGFR3</i>  |                 |               |
| <i>NRP2</i>    |                 |               |
| <i>FGF2</i>    |                 |               |
| <i>FGF9</i>    | Angiogenesis    | Activation    |
| <i>FGFR1</i>   |                 |               |
| <i>FGFR2</i>   |                 |               |
| <i>FGFR3</i>   |                 |               |
| <i>FGFR4</i>   |                 |               |
| <i>ANGPT2</i>  |                 |               |
| <i>ANGPTL1</i> |                 |               |
| <i>ANGPTL4</i> |                 |               |
| <i>EGF</i>     |                 |               |
| <i>EGFL7</i>   |                 |               |
| <i>EFNA5</i>   |                 |               |

**Supplemental Table 1. Direct BACH1 target genes and their regulation in human lung cancer cells.** Total list of genes identified and validated as BACH1 targets in CUT&Tag and RT-qPCR experiments.

**Supplemental Table 2. Characteristics of the analyzed patients with KRAS mutation**

| <b>Characteristics</b>              |                          | <b>KRAS mutation<br/>(n=20)</b> |
|-------------------------------------|--------------------------|---------------------------------|
| <b>Sex, n(%)</b>                    | Male                     | 14(70.0%)                       |
|                                     | Female                   | 6(30.0%)                        |
| <b>Age, median (min, max), year</b> |                          | 64.5(54-79)                     |
| <b>Tumor location, n(%)</b>         | Upper lobe of left lung  | 3(15.0%)                        |
|                                     | Lower lobe of left lung  | 8(40.0%)                        |
|                                     | Upper lobe of right lung | 4(20.0%)                        |
|                                     | Middle lobe of left lung | 2(10.0%)                        |
|                                     | Lower lobe of left lung  | 3(15.0%)                        |
| <b>Differentiation, n(%)</b>        | Well                     | 2(10.0%)                        |
|                                     | Moderate                 | 6(30.0%)                        |
|                                     | Poor                     | 12(60.0%)                       |
| <b>T stage, n(%)</b>                | T1                       | 7(35.0%)                        |
|                                     | T2                       | 11(55.0%)                       |
|                                     | T3                       | 1(5.0%)                         |
|                                     | T4                       | 1(5.0%)                         |
| <b>N stage, n(%)</b>                | N0                       | 11(55.0%)                       |
|                                     | N1                       | 3(15.0%)                        |
|                                     | N2                       | 6(30.0%)                        |
| <b>M stage, n(%)</b>                | M0                       | 16(80.0%)                       |
|                                     | M1                       | 4(20.0%)                        |
| <b>cTNM stage*, n(%)</b>            | I                        | 8(40.0%)                        |
|                                     | II                       | 1(5.0%)                         |
|                                     | III                      | 7(35.0%)                        |
|                                     | IV                       | 4(20.0%)                        |

\* 8<sup>th</sup> AJCC staging.

Categorical variables were expressed as frequencies (n) and proportions (%).

Continuous variables were expressed as frequencies (n) and proportions (%).

**Supplemental Table 2. Characteristics of patients and tumors.**
